# Supplementary material
Source: publisher figshare collection journal article supplement (https://sage.figshare.com/ndownloader/files/15264194)
Supplement: Supplementary file 1 [file 15264194]

Supplementary Figure 1: A plot of the average predictive margins for culture and quality of life on depression symptomology – South Asians versus Arabs comparison

Supplementary Figure 2: A plot of the average predictive margins for culture and quality of life on depression symptomology – Nepaytmj
